# Supplementary material for: De relatie tussen ziekenhuisopname door COVID-19 en ervaren, mentale en fysieke gezondheid na twaalf maanden
Source: Springer Nature journal article supplement (doi:10.1007/s12508-023-00421-x), 2023-11-15
Supplement: MOESM1 [file 26310286]

**Bijlage 1.** Vraagstellingen van de uitkomstmaten in de vragenlijsten van de GGD’en en Rijnstate

Ervaren gezondheid
De ervaren gezondheid is gemeten door middel van een vraag uit de Short Form (36) Health Survey (SF-36) [1]. Aan respondenten van de GGD’en werd gevraagd: ‘*Hoe is over het algemeen uw gezondheid?*’, waarbij men kon antwoorden met behulp van een vijfpuntsschaal, die liep van ‘*zeer goed*’ naar ‘*zeer slecht*’. Respondenten van Rijnstate kregen de vraag: ‘*Hoe zou u over het algemeen uw gezondheid noemen?*’, waarbij men kon antwoorden met behulp van een vijfpuntsschaal, die liep van ‘*uitstekend*’ naar ‘*slecht*’.

Mentale gezondheid
Mentale gezondheid is gemeten middels de Mental Health Inventory 5 (MHI-5) [2]. Dit is de internationale standaard voor het meten van psychische gezondheid [2]. Respondenten van de GGD’en kregen de vraag voorgelegd ‘*De volgende vragen gaan over hoe u zich de afgelopen 7 dagen (1 week) heeft gevoeld. Wilt u bij elke vraag het antwoord aanvinken dat het beste aansluit bij uw gevoel?*’. Zij konden bij ieder van de vijf vragen antwoorden met ‘*voortdurend*’, ‘*meestal*’, ‘*vaak*’, ‘*soms*’, ‘*zelden*’ of ‘*nooit*’. De volgende vragen werden gesteld:

- Voelde u zich erg zenuwachtig?
- Zat u zo erg in de put dat niets u kon opvrolijken?
- Voelde u zich kalm en rustig?
- Voelde u zich neerslachtig en somber?
- Voelde u zich gelukkig?

Bij Rijnstate werd de situatie voorgelegd: ‘*Deze vragen gaan over hoe u zich voelt en hoe het met u ging in de afgelopen 4 weken. Wilt u a.u.b. bij elke vraag het antwoord geven dat het best benadert hoe u zich voelde.*’. Zij konden bij ieder van de vijf vragen antwoorden met ‘*altijd*’, ‘*meestal*’, ‘*vaak*’, ‘*soms*’, ‘*zelden*’ of ‘*nooit*’. De volgende vragen werden gesteld:

- Was u erg zenuwachtig?
- Zat u zo in de put dat niets u kon opvrolijken?
- Voelde u zich rustig en tevreden?
- Voelde u zich somber en neerslachtig?
- Was u een gelukkig mens?

Op basis van de antwoorden werd een somscore gemaakt, waarbij respondenten met een score van 60 of hoger een goede mentale gezondheid bezitten en respondenten met een score lager dan 60 een slechtere mentale gezondheid [2].

Beperking van fysieke inspanningVoor het uitvragen van beperking van fysieke inspanning is gebruik gemaakt van een vraag afgeleid uit de SF-36 [1]. Deze uitkomstmaat is beschikbaar voor GGD-respondenten die op dat moment restklachten van COVID-19 ervaarden, en voor alle respondenten van Rijnstate. Beperking werd uitgevraagd voor drie vormen van fysieke inspanning: 1) lichte inspanning, zoals boodschappen tillen, een trap oplopen, uzelf wassen of aankleden, 2) matige inspanning, zoals een tafel verplaatsen, stofzuigen, zwemmen of fietsen en 3) forse inspanning, zoals hardlopen, tillen van zware voorwerpen of een veeleisende sport beoefenen. Respondenten konden antwoorden met: ‘*Nee, helemaal niet beperkt*’, ‘*Ja, een beetje beperkt*’ of ‘*Ja, ernstig beperkt*’.

De omschrijving van forse en matige inspanning waren hetzelfde bij de GGD’en en Rijnstate. De activiteiten rondom lichte inspanning, namelijk boodschappen tillen, een trap oplopen en uzelf wassen of aankleden werden als aparte activiteiten uitgevraagd bij Rijnstate. Om deze vorm van inspanning te kunnen samenvoegen met de data van GGD’en is ervoor gekozen een samengestelde score aan te maken. Hierbij is de zwaarste mate van beperking op één van deze activiteiten gekozen als de score op mate van beperking voor lichte fysieke inspanning.

**Literatuur**

1. Aaronson NK, Muller M, Cohen PD et al. Translation, validation, and norming of the Dutch language version of the SF-36 Health Survey in community and chronic disease populations. J Clin Epidemiol. 1998;51:1055–68.

2. Perenboom R, Oudshoorn K, van Herten L et al. Levensverwachting in goede geestelijke gezondheid: bepaling afkappunten en wegingsfactoren voor de MHI-5 en GHQ-12. Leiden: TN
